# Supplementary material
Source: PubMed Central journal article supplement (PMC7147253)
Supplement: cm9b04907_si_001.pdf [file cm9b04907_si_001.pdf]

## Supporting Information

for

# Modelling of Gas Transport through Polymer/MOF Interfaces: A Microsecond Scale Concentration Gradient Driven Molecular Dynamics Study

Aydin Ozcan,<sup>a</sup> Rocio Semino,<sup>b</sup> Guillaume Maurin<sup>b</sup> and A. Ozgur Yazaydin<sup>\*a</sup>

<sup>a</sup>Department of Chemical Engineering, University College London, London, WC1E 7JE, UK. E-mail: ozgur.yazaydin@ucl.ac.uk.

<sup>b</sup>Institut Charles Gerhardt Montpellier UMR 5253 CNRS ENSCM, Université de Montpellier, Place E. Bataillon, 34095 Montpellier cedex 05, France.

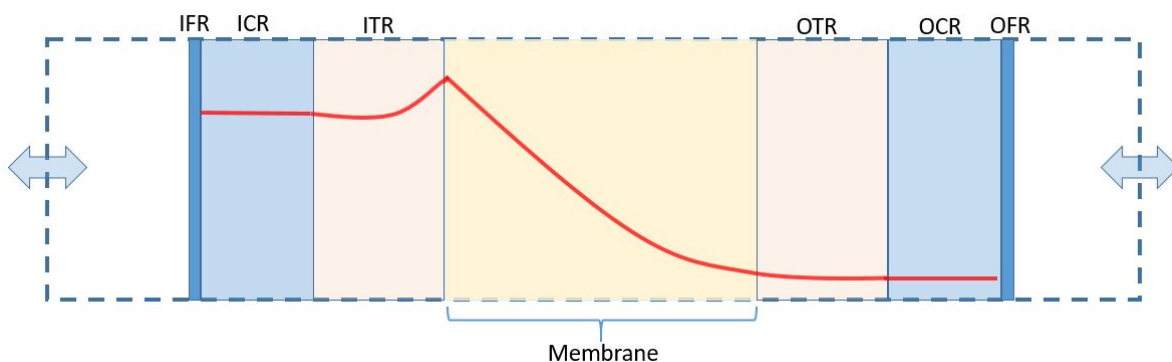

**Figure S1:** Schematic representation of CGD-MD simulation setup. IFR, ICR and ITR are force, control and transition regions for the inlet. OFR, OCR and OTR are force, control and transition regions for the outlet. A bell shaped force acts at the centre of the IFR and OFR. The red line is an illustration of the density profile of fluid molecules due to the concentration gradient. The blue dashed line represents the simulation box.

**Table S1:** CGD-MD specific parameters used in simulations.  $Z_F$  is the position where the centre of a bell shaped bias function is placed with respect to the  $z=0$  (i.e. these correspond to the centre of the IFR and OFR shown in Figure S1),  $w$  is the width of the bias force function (i.e. width of IFR and OFR), and  $k_i$  is the bias force constant.

|                                 | $Z_F$<br>(nm) | $w$<br>(nm) | $k_i$<br>(kJ nm <sup>3</sup> /mol) |                                         | ICR/OCR<br>width<br>(nm) | ITR/OTR<br>width<br>(nm) |
|---------------------------------|---------------|-------------|------------------------------------|-----------------------------------------|--------------------------|--------------------------|
| PIM-1<br>(Single<br>Permeation) | 5.125         | 0.25        | Inlet                              | $k_{CH_4}=5,000$<br>$k_{H_2}=5,000$     | 2.5                      | 2.5                      |
|                                 | 36.125        | 0.25        | Outlet                             | $k_{CH_4}=500,000$<br>$k_{H_2}=500,000$ | 2.5                      | 2.5                      |
| ZIF-8<br>(Single<br>Permeation) | 5.175         | 0.25        | Inlet                              | $k_{CH_4}=5,000$<br>$k_{H_2}=8,000$     | 2.5                      | 2.5                      |
|                                 | 25.125        | 0.25        | Outlet                             | $k_{CH_4}=500,000$<br>$k_{H_2}=500,000$ | 2.5                      | 2.5                      |
| MMM<br>(Single<br>Permeation)   | 15.125        | 0.25        | Inlet                              | $k_{CH_4}=20,000$<br>$k_{H_2}=20,000$   | 2.5                      | 2.5                      |
|                                 | 76.775        | 0.25        | Outlet                             | $k_{CH_4}=500,000$<br>$k_{H_2}=500,000$ | 2.5                      | 2.5                      |
| MMM<br>(Mixture<br>Permeation)  | 15.125        | 0.25        | Inlet                              | $k_{CH_4}=20,000$<br>$k_{H_2}=20,000$   | 2.5                      | 2.5                      |
|                                 | 76.775        | 0.25        | Outlet                             | $k_{CH_4}=500,000$<br>$k_{H_2}=500,000$ | 2.5                      | 2.5                      |

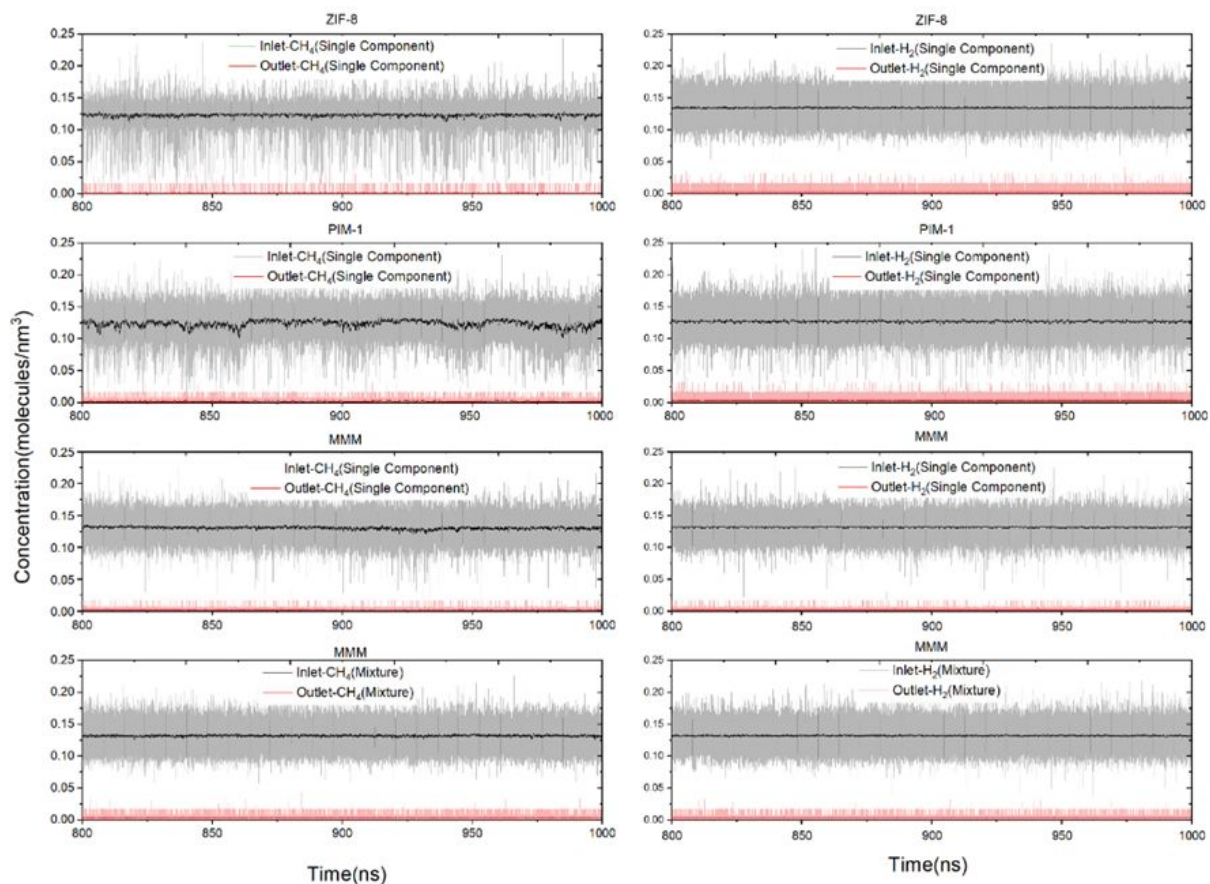

**Figure S2:** Variation of a) CH<sub>4</sub> and b) H<sub>2</sub> concentrations as a function of simulation time in the inlet (black lines) and outlet (red lines) control regions (ICR and OCR, respectively), for (from top to bottom), single component ZIF-8, PIM-1 and PIM-1/ZIF-8 and mixture PIM-1/ZIF-8 CGD-MD simulations. Dark lines are moving averages of the gas concentrations whereas transparent colours are instantaneous concentrations in the control regions.



**Table S3:** Permeabilities of H<sub>2</sub> and CH<sub>4</sub> obtained from CGD-MD simulations.

| Membrane                       | Permeability (x10 <sup>13</sup> mol.m/m <sup>2</sup> sPa) |                |
|--------------------------------|-----------------------------------------------------------|----------------|
|                                | CH <sub>4</sub>                                           | H <sub>2</sub> |
| ZIF-8                          | 62.5                                                      | 320.2          |
| PIM-1                          | 128.0                                                     | 803.2          |
| PIM-1/ZIF-8 (single component) | 136.4                                                     | 628.4          |
| PIM-1/ZIF-8 (mixture)          | 139.8                                                     | 470.0          |
